# Supplementary material for: Legitimising European Governance: Taking Subsidiarity Seriously within the Open Method of Coordination
Source: MDPI journal article supplement (doi:10.3390/vaccines11091499), 2002-08-01
Supplement: s1 [file s1]

**TABLE S1A.** MDA Efficacy Study Haemagglutination Inhibition (HAI) Serological Data

| Group           | Pup ID | Days Post Vaccination |      |      |      |     |     |      |     |      |      |      |      |      |      |      |        |        |        |
|-----------------|--------|-----------------------|------|------|------|-----|-----|------|-----|------|------|------|------|------|------|------|--------|--------|--------|
|                 |        | 0                     |      |      | 4    |     |     | 7    |     |      | 11   |      |      | 14   |      |      | 18     |        |        |
|                 |        | 2a                    | 2b   | 2c   | 2a   | 2b  | 2c  | 2a   | 2b  | 2c   | 2a   | 2b   | 2c   | 2a   | 2b   | 2c   | 2a     | 2b     | 2c     |
| 1<br>Vaccinates | 8732   | 576                   | 576  | 832  | 576  | 576 | 576 | 832  | 576 | 576  | 416  | 288  | 416  | 288  | 288  | 416  | 288    | 288    | 288    |
|                 | 8995   | 288                   | 288  | 288  | 288  | 288 | 288 | 256  | 288 | 288  | 208  | 208  | 288  | 144  | 144  | 104  | 7168   | 9216   | 9216   |
|                 | 9019   | 288                   | 288  | 288  | 208  | 288 | 288 | 288  | 288 | 288  | 288  | 208  | 288  | <16  | <16  | <16  | 14,336 | 18,432 | 18,432 |
|                 | 8651   | 288                   | 288  | 416  | 288  | 416 | 288 | 144  | 144 | 208  | 4608 | 6656 | 9216 | 4608 | 9216 | 9216 | 9216   | 13,312 | 13,312 |
|                 | 8580   | 416                   | 416  | 416  | 288  | 416 | 416 | 16   | <16 | <16  | 3328 | 4608 | 6656 | †    |      |      |        |        |        |
|                 | 9030   | 288                   | 288  | 416  | 288  | 288 | 208 | 208  | 288 | 288  | 288  | 416  | 416  | 4608 | 6656 | 9216 | 18,432 | 13,312 | 18,432 |
|                 | 8584   | 416                   | 416  | 416  | 416  | 416 | 288 | 18   | <16 | <16  | 3328 | 3328 | 6656 | 4608 | 6656 | 6656 | 9216   | 9216   | 9216   |
|                 | 9002   | 576                   | 832  | 832  | 576  | 576 | 576 | 576  | 576 | 576  | 576  | 288  | 576  | 416  | 416  | 576  | 576    | 448    | 416    |
|                 | 8998   | 832                   | 832  | 576  | 576  | 576 | 576 | 576  | 576 | 576  | 576  | 576  | 832  | 4608 | 6656 | 9216 | 9216   | 9216   | 13,312 |
|                 | 8635   | 1152                  | 1152 | 832  | 576  | 832 | 576 | 576  | 576 | 896  | 576  | 576  | 576  | 576  | 672  | 576  | 416    | 576    | 416    |
|                 | 8755   | 1152                  | 1152 | 1664 | 1152 | 832 | 576 | 1152 | 832 | 1152 | 576  | 576  | 832  | 576  | 576  | 416  | 576    | 416    | 416    |
| 2<br>Controls   | 9033   | 208                   | 288  | 288  | 144  | 208 | 144 | 144  | 208 | 288  | 208  | 144  | 208  | 144  | 208  | 104  | 144    | 144    | 208    |
|                 | 9024   | 416                   | 288  | 416  | 288  | 288 | 288 | 288  | 416 | 288  | 288  | 288  | 288  | 208  | 288  | 208  | 288    | 208    | 208    |
|                 | 8747   | 832                   | 832  | 832  | 576  | 576 | 576 | 576  | 576 | 832  | 576  | 416  | 576  | 416  | 288  | 416  | 288    | 288    | 416    |
|                 | 8582   | 832                   | 832  | 832  | 576  | 576 | 576 | 576  | 832 | 832  | 832  | 576  | 576  | 576  | 576  | 416  | 576    | 448    | 416    |
|                 | 8751   | 832                   | 576  | 832  | 576  | 576 | 416 | 832  | 576 | 832  | 576  | 416  | 416  | 288  | 416  | 288  | 416    | 288    | 416    |

| Group           | Pup ID | Days Post Vaccination |        |        |        |        |        |        |        |        |        |         |         |         |         |         |
|-----------------|--------|-----------------------|--------|--------|--------|--------|--------|--------|--------|--------|--------|---------|---------|---------|---------|---------|
|                 |        | 21                    |        |        | 25     |        |        | 28     |        |        | 31     |         |         | 34      |         |         |
|                 |        | 2a                    | 2b     | 2c     | 2a     | 2b     | 2c     | 2a     | 2b     | 2c     | 2a     | 2b      | 2c      | 2a      | 2b      | 2c      |
| 1<br>Vaccinates | 8732   | 144                   | 144    | 288    | 104    | 144    | 144    | 576    | 832    | 1152   | 18,432 | >40,960 | >40,960 | >40,960 | >40,960 | >40,960 |
|                 | 8995   | 18,432                | 18,432 | 18,432 | 18,432 | 18,432 | 18,432 | 13,312 | 18,432 | 13,312 | 9216   | 13,312  | 13,312  | 18,432  | 18,432  | 18,432  |
|                 | 9019   | 9216                  | 13,312 | 18,432 | 9216   | 9216   | 9216   | 6656   | 9216   | 6656   | 6656   | 9216    | 9216    | 6656    | 9216    | 9216    |
|                 | 8651   | 9216                  | 18,432 | 18,432 | 6656   | 9216   | 9216   | 6656   | 9216   | 6656   | 6656   | 13,312  | 9216    | 9216    | 18,432  | 18,432  |
|                 | 8580   | †                     |        |        |        |        |        |        |        |        |        |         |         |         |         |         |
|                 | 9030   | 13,312                | 18,432 | 18,432 | 18,432 | 18,432 | 18,432 | 13,312 | 18,432 | 13,312 | 6656   | 13,312  | 13,312  | 13,312  | 18,432  | 18,432  |
|                 | 8584   | 6656                  | 9216   | 9216   | 4608   | 9216   | 9216   | 6656   | 9216   | 6656   | 6656   | 9216    | 6656    | 9216    | 9216    | 13,312  |
|                 | 9002   | 288                   | 288    | 288    | 144    | 208    | 208    | 144    | 144    | 144    | 104    | 104     | 104     | 104     | 104     | 144     |
|                 | 8998   | 6656                  | 9216   | 9216   | 4608   | 6656   | 9216   | 4608   | 9216   | 6656   | 4608   | 6656    | 6656    | 9216    | 9216    | 9216    |
|                 | 8635   | 288                   | 288    | 288    | 208    | 224    | 208    | 144    | 144    | 144    | 144    | 104     | 104     | 104     | 72      | 144     |
|                 | 8755   | 288                   | 288    | 288    | 208    | 144    | 208    | 144    | 144    | 144    | 144    | 104     | 144     | 104     | 144     | 144     |
| 2<br>Controls   | 9033   | 52                    | 72     | 72     | 36     | 52     | 52     | 72     | 72     | 72     | 26     | 26      | 36      | 18      | 36      | 56      |
|                 | 9024   | 144                   | 104    | 144    | 72     | 144    | 104    | 104    | 104    | 72     | 72     | 52      | 72      | 72      | 72      | 112     |
|                 | 8747   | 288                   | 144    | 288    | 144    | 144    | 144    | 144    | 144    | 144    | 104    | 104     | 104     | 72      | 72      | 144     |
|                 | 8582   | 288                   | 288    | 288    | 144    | 208    | 144    | 144    | 144    | 144    | 144    | 104     | 144     | 72      | 72      | 144     |
|                 | 8751   | 208                   | 208    | 288    | 144    | 144    | 144    | 144    | 72     | 112    | 72     | 72      | 104     | 72      | 72      | 144     |

| Group           | Pup ID | Days Post Vaccination |        |        |        |        |        |         |         |         |        |        |        |        |        |        |
|-----------------|--------|-----------------------|--------|--------|--------|--------|--------|---------|---------|---------|--------|--------|--------|--------|--------|--------|
|                 |        | 38                    |        |        | 41     |        |        | 45      |         |         | 48     |        |        | 52     |        |        |
|                 |        | 2a                    | 2b     | 2c     | 2a     | 2b     | 2c     | 2a      | 2b      | 2c      | 2a     | 2b     | 2c     | 2a     | 2b     | 2c     |
| 1<br>Vaccinates | 8732   | 18,432                | 18,432 | 26,624 | 13,312 | 18,432 | 18,432 | 13,312  | 18,432  | >26,624 | 13,312 | 13,312 | 13,312 | 7168   | 9216   | 18,432 |
|                 | 8995   | 9216                  | 9216   | 18,432 | 9216   | 18,432 | 13,312 | 13,312  | 18,432  | 18,432  | 13,312 | 13,312 | 13,312 | 9216   | 9216   | 14,336 |
|                 | 9019   | 6656                  | 9216   | 9216   | 6656   | 9216   | 6656   | 9216    | 13,312  | 13,312  | 9216   | 9216   | 9216   | 4608   | 9216   | 9216   |
|                 | 8651   | 9216                  | 9216   | 14,336 | 13,312 | 13,312 | 13,312 | 18,432  | 18,432  | >26,624 | 18,432 | 13,312 | 18,432 | 9216   | 13,312 | 18,432 |
|                 | 8580   | †                     |        |        |        |        |        |         |         |         |        |        |        |        |        |        |
|                 | 9030   | 9216                  | 9216   | 14,336 | 9216   | 9216   | 13,312 | 13,312  | 18,432  | 18,432  | 13,312 | 9216   | 13,312 | 9216   | 9216   | 9216   |
|                 | 8584   | 9216                  | 9216   | 9216   | 9216   | 6656   | 9216   | 9216    | 18,432  | 18,432  | 9216   | 9216   | 18,432 | 9216   | 9216   | 9216   |
|                 | 9002   | 72                    | 144    | 72     | 72     | 72     | 52     | 72      | 112     | 144     | 56     | 72     | 52     | 9216   | 9216   | 18,432 |
|                 | 8998   | 6656                  | 9216   | 9216   | 4608   | 6656   | 6656   | 6656    | 9216    | 18,432  | 13,312 | 7168   | 9216   | 4608   | 6656   | 9216   |
|                 | 8635   | 104                   | 104    | 72     | <16    | <16    | <16    | >26,624 | >40,960 | >40,960 | 18,432 | 18,432 | 28,672 | 13,312 | 13,312 | 18,432 |
|                 | 8755   | 104                   | 104    | 72     | 72     | 72     | 72     | 72      | 104     | 104     | 36     | 72     | 36     | 9216   | 8192   | 13,312 |
| 2<br>Controls   | 9033   | 36                    | 52     | 52     | 28     | 28     | 18     | 16      | 36      | 52      | 36     | 104    | 52     | <8     | <8     | <8     |
|                 | 9024   | 52                    | 52     | 52     | 36     | 36     | 36     | 36      | 72      | 72      | 36     | 104    | 36     | 14     | 18     | 18     |
|                 | 8747   | 72                    | 104    | 52     | 72     | 52     | 52     | 72      | 104     | 104     | 52     | 56     | 36     | 26     | 36     | 26     |
|                 | 8582   | 72                    | 104    | 72     | 72     | 52     | 52     | 72      | 104     | 104     | 72     | 56     | 36     | 36     | 36     | 36     |
|                 | 8751   | 72                    | 52     | 36     | 36     | 36     | 36     | 36      | 72      | 72      | 36     | 56     | 36     | 18     | 18     | 18     |

† : Pup was euthanased for general health reasons unrelated to vaccination

Grey shaded: Active seroconversion (>twofold rise in antibody titre). The first indication of an active immune response to vaccination is marked by the sudden disappearance of maternally derived antibody and a short timeframe of seronegativity that coincides with a vaccine virus viraemia and precedes a rapid active antibody response.

**TABLE S1B.** MDA Efficacy Study Serum Neutralisation (SN) Serological Data

| Group           | Pup ID | Days Post Vaccination |      |      |      |      |      |      |      |      |      |      |      |           |        |        |           |          |         |
|-----------------|--------|-----------------------|------|------|------|------|------|------|------|------|------|------|------|-----------|--------|--------|-----------|----------|---------|
|                 |        | 0                     |      |      | 4    |      |      | 7    |      |      | 11   |      |      | 14        |        |        | 18        |          |         |
|                 |        | 2a                    | 2b   | 2c   | 2a   | 2b   | 2c   | 2a   | 2b   | 2c   | 2a   | 2b   | 2c   | 2a        | 2b     | 2c     | 2a        | 2b       | 2c      |
| 1<br>Vaccinates | 8732   | 3200                  | 2016 | 2016 | 1008 | 4032 | 1131 | 635  | 1796 | 1008 | 640  | 1016 | 905  | 453       | 751    | 545    | 403       | 254      | 226     |
|                 | 8995   | 806                   | 718  | 806  | 508  | 905  | 905  | 359  | 806  | 640  | 376  | 905  | 320  | No Sample |        |        | 36,204    | 36,204   | 51,200  |
|                 | 9019   | 905                   | 403  | 905  | 453  | 905  | 806  | 453  | 806  | 640  | 453  | 806  | 508  | ≤14       | ≤14    | ≤14    | 18,102    | 21,816   | 21,816  |
|                 | 8651   | 905                   | 718  | 905  | 545  | 1091 | 806  | 160  | 320  | 320  | 3805 | 1878 | 4755 | 2363      | 12,800 | 6400   | No Sample |          |         |
|                 | 8580   | 905                   | 905  | 1016 | 718  | 905  | 806  | ≤14  | ≤14  | ≤14  | 1903 | 9051 | 2263 | †         |        |        |           |          |         |
|                 | 9030   | 905                   | 806  | 905  | 403  | 1280 | 905  | 453  | 905  | 806  | 453  | 640  | 254  | 18,102    | 36,204 | 18,102 | ≥129,016  | ≥129,016 | 102,400 |
|                 | 8584   | 1280                  | 640  | 1280 | 718  | 1613 | 905  | ≤14  | ≤14  | ≤14  | 2263 | 6400 | 2263 | 5454      | 9051   | 8063   | 18,102    | 32,254   | 21,816  |
|                 | 9002   | 2540                  | 3200 | 4032 | 1363 | 4032 | 1363 | 1131 | 2263 | 1600 | 905  | 1613 | 1280 | 508       | 1016   | 640    | 806       | 320      | 508     |
|                 | 8998   | 4032                  | 2263 | 2263 | 1363 | 3200 | 1600 | 1131 | 2263 | 1270 | 320  | 202  | 403  | 5454      | 15,020 | 12,800 | 32,254    | 20,319   | 25,600  |
|                 | 8635   | 4032                  | 1878 | 1878 | 1131 | 4525 | 2540 | 1270 | 2263 | 2263 | 800  | 2263 | 1131 | 504       | 2016   | 635    | 806       | 508      | 453     |
|                 | 8755   | 4525                  | 3200 | 4525 | 2540 | 4032 | 3200 | 2016 | 5080 | 2016 | 1181 | 3200 | 1600 | 800       | 2263   | 1270   | 453       | 320      | 453     |
| 2<br>Controls   | 9033   | 545                   | 226  | 640  | 453  | 905  | 751  | 273  | 508  | 403  | 202  | 751  | 226  | 160       | 453    | 376    | 101       | 32       | 80      |
|                 | 9024   | 806                   | 538  | 905  | 508  | 1280 | 806  | 403  | 640  | 640  | 453  | 905  | 453  | 320       | 453    | 320    | 202       | 101      | 226     |
|                 | 8747   | 4032                  | 2540 | 4032 | 1008 | 4525 | 2540 | 1008 | 3200 | 1600 | 640  | 1810 | 1280 | 473       | 1613   | 1613   | 453       | 160      | 453     |
|                 | 8582   | 4032                  | 3200 | 4032 | 1131 | 3200 | 2016 | 1363 | 3200 | 2263 | 686  | 2540 | 1131 | 800       | 2016   | 1270   | 806       | 376      | 453     |
|                 | 8751   | 3200                  | 2016 | 2727 | 1181 | 2263 | 1600 | 1131 | 3200 | 1008 | 1810 | 1613 | 1280 | 453       | 1810   | 1613   | 403       | 254      | 320     |

| Group           | Pup ID | Days Post Vaccination |        |        |           |          |         |          |          |          |        |        |        |        |        |        |
|-----------------|--------|-----------------------|--------|--------|-----------|----------|---------|----------|----------|----------|--------|--------|--------|--------|--------|--------|
|                 |        | 21                    |        |        | 25        |          |         | 28       |          |          | 31     |        |        | 34     |        |        |
|                 |        | 2a                    | 2b     | 2c     | 2a        | 2b       | 2c      | 2a       | 2b       | 2c       | 2a     | 2b     | 2c     | 2a     | 2b     | 2c     |
| 1<br>Vaccinates | 8732   | 453                   | 188    | 453    | 403       | 254      | 226     | 469      | 317      | 317      | 25,600 | 12,800 | 30,444 | 30,041 | 20,319 | 20,319 |
|                 | 8995   | 32,254                | 36,204 | 18,102 | 36,204    | 36,204   | 51,200  | 36,204   | 64,508   | 64,508   | 20,319 | 32,254 | 36,204 | 36,204 | 32,254 | 51,200 |
|                 | 9019   | 21,816                | 20,319 | 20,319 | 18,102    | 21,816   | 21,816  | 18,102   | 18,102   | 12,800   | 16,127 | 16,127 | 10,159 | 10,159 | 25,600 | 20,319 |
|                 | 8651   | 30,041                | 30,041 | 25,600 | No Sample |          |         | 32,254   | 32,254   | 36,204   | 36,204 | 32,254 | 32,254 | 18,102 | 36,204 | 43,632 |
|                 | 8580   | †                     |        |        |           |          |         |          |          |          |        |        |        |        |        |        |
|                 | 9030   | 64,508                | 36,204 | 51,200 | ≥129,016  | ≥129,016 | 102,400 | ≥144,815 | ≥144,815 | ≥144,815 | 64,508 | 72,408 | 51,200 | 72,408 | 72,408 | 64,508 |
|                 | 8584   | 16,127                | 21,816 | 25,600 | 18,102    | 32,254   | 21,816  | 32,254   | 36,204   | 40,637   | 36,204 | 30,041 | 32,254 | 36,204 | 40,637 | 51,200 |
|                 | 9002   | 640                   | 806    | 508    | 806       | 320      | 508     | 545      | 180      | 403      | 188    | 127    | 254    | 226    | 160    | 320    |
|                 | 8998   | 16,127                | 18,102 | 32,254 | 32,254    | 20,319   | 25,600  | 32,254   | 32,254   | 32,254   | 25,600 | 20,319 | 32,254 | 25,600 | 32,254 | 51,200 |
|                 | 8635   | 1016                  | 640    | 905    | 806       | 508      | 453     | 453      | 202      | 453      | 254    | 254    | 273    | 226    | 160    | 226    |
| 8755            | 905    | 640                   | 806    | 453    | 320       | 453      | 453     | 160      | 453      | 320      | 226    | 202    | 254    | 188    | 202    |        |
| 2<br>Controls   | 9033   | 160                   | 68     | 202    | 101       | 32       | 80      | 63       | 28       | 80       | 50     | 40     | 57     | 40     | 57     | 50     |
|                 | 9024   | 226                   | 118    | 254    | 202       | 101      | 226     | 127      | 68       | 160      | 101    | 57     | 113    | 80     | 101    | 101    |
|                 | 8747   | 806                   | 254    | 453    | 453       | 160      | 453     | 453      | 160      | 226      | 226    | 160    | 202    | 160    | 160    | 127    |
|                 | 8582   | 806                   | 806    | 806    | 806       | 376      | 453     | 403      | 226      | 508      | 160    | 160    | 320    | 226    | 160    | 127    |
|                 | 8751   | 640                   | 403    | 403    | 403       | 254      | 320     | 403      | 226      | 226      | 202    | 160    | 202    | 160    | 136    | 160    |

| Group           | Pup ID | Days Post Vaccination |        |        |        |          |        |        |        |        |        |        |        |        |        |         |
|-----------------|--------|-----------------------|--------|--------|--------|----------|--------|--------|--------|--------|--------|--------|--------|--------|--------|---------|
|                 |        | 38                    |        |        | 41     |          |        | 45     |        |        | 48     |        |        | 52     |        |         |
|                 |        | 2a                    | 2b     | 2c     | 2a     | 2b       | 2c     | 2a     | 2b     | 2c     | 2a     | 2b     | 2c     | 2a     | 2b     | 2c      |
| 1<br>Vaccinates | 8732   | 15,020                | 20,319 | 36,204 | 12,800 | 12,800   | 12,800 | 10,763 | 25,600 | 16,127 | 40,637 | 25,600 | 25,600 | 36,204 | 25,600 | 64,508  |
|                 | 8995   | 36,204                | 64,508 | 51,200 | 36,204 | 36,204   | 40,637 | 36,204 | 72,408 | 64,508 | 51,200 | 36,204 | 40,637 | 64,508 | 36,204 | 64,508  |
|                 | 9019   | 36,204                | 36,204 | 36,204 | 30,041 | 32,254   | 51,200 | 25,600 | 25,600 | 32,254 | 25,600 | 20,319 | 36,204 | 36,204 | 36,204 | 40,637  |
|                 | 8651   | 57,470                | 64,508 | 64,508 | 51,200 | ≥144,815 | 87,263 | 51,200 | 72,408 | 81,275 | 72,408 | 64,508 | 87,263 | 72,408 | 64,508 | 102,400 |
|                 | 8580   | †                     |        |        |        |          |        |        |        |        |        |        |        |        |        |         |
|                 | 9030   | 64,508                | 36,204 | 64,508 | 40,637 | ≥144,815 | 72,408 | 51,200 | 72,408 | 40,637 | 72,408 | 30,041 | 51,200 | 40,637 | 30,444 | 64,508  |
|                 | 8584   | 32,254                | 64,508 | 51,200 | 36,204 | ≥144,815 | 40,637 | 36,204 | 57,470 | 72,408 | 36,204 | 40,637 | 64,508 | 40,637 | 57,470 | 64,508  |
|                 | 9002   | 160                   | 113    | 160    | 101    | 127      | 113    | 101    | 80     | 101    | 50     | ≤14    | 40     | 10,908 | 10,159 | 10,159  |
|                 | 8998   | 32,254                | 32,254 | 36,204 | 15,020 | 25,600   | 32,254 | 18,102 | 32,254 | 32,254 | 32,254 | 36,204 | 40,637 | 25,600 | 20,319 | 32,254  |
|                 | 8635   | 226                   | 113    | 202    | ≤14    | ≤14      | ≤14    | 16,127 | 25,600 | 32,254 | 25,600 | 12,800 | 25,600 | 36,204 | 14,368 | 28,735  |
| 8755            | 226    | 160                   | 160    | 202    | 202    | 226      | 113    | 68     | 113    | 63     | ≤15    | 57     | 9051   | 3200   | 14,368 |         |
| 2<br>Controls   | 9033   | 40                    | 40     | 45     | 28     | 50       | 28     | 25     | 25     | 25     | 25     | ≤14    | ≤14    | ≤14    | ≤14    | ≤16     |
|                 | 9024   | 80                    | 80     | 101    | 57     | 101      | 57     | 50     | 50     | 50     | 40     | ≤18    | 50     | 28     | 28     | 32      |
|                 | 8747   | 127                   | 101    | 127    | 113    | 113      | 80     | 63     | 63     | 63     | 57     | 34     | 50     | 80     | 28     | 50      |
|                 | 8582   | 160                   | 113    | 160    | 136    | 136      | 160    | 80     | 113    | 113    | 113    | 59     | 80     | 101    | 57     | 113     |
|                 | 8751   | 113                   | 80     | 127    | 50     | 63       | 80     | 63     | 40     | 57     | 63     | 45     | 50     | 40     | 28     | 40      |
